# Supplementary material for: A vertical-flow bioreactor array compacts hepatocytes for enhanced polarity and functions
Source: Royal Society of Chemistry journal article supplement (doi:10.1039/c6lc00811a), 2016-01-01
Supplement: c6lc00811a1.pdf [file c6lc00811a1.pdf]

## Lab on a Chip

### ARTICLE

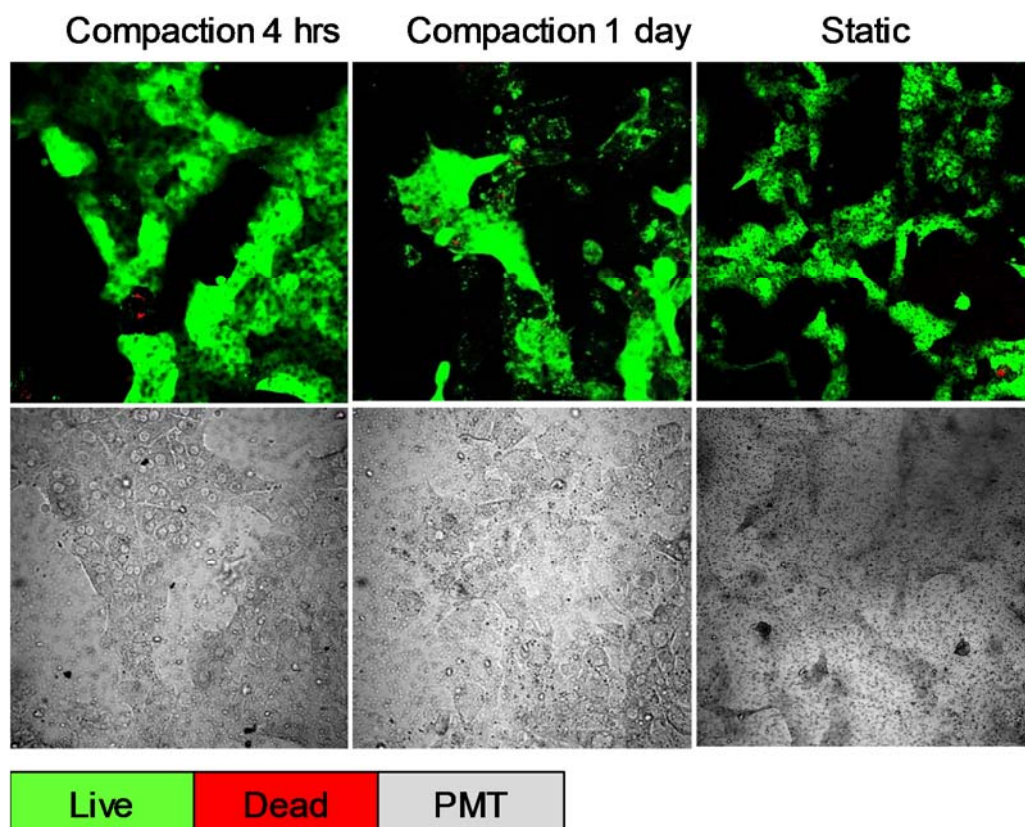

**Figure S1.** Live-dead staining of hepatocytes in Compaction and Static culture. Images taken by 20X confocal microscope.

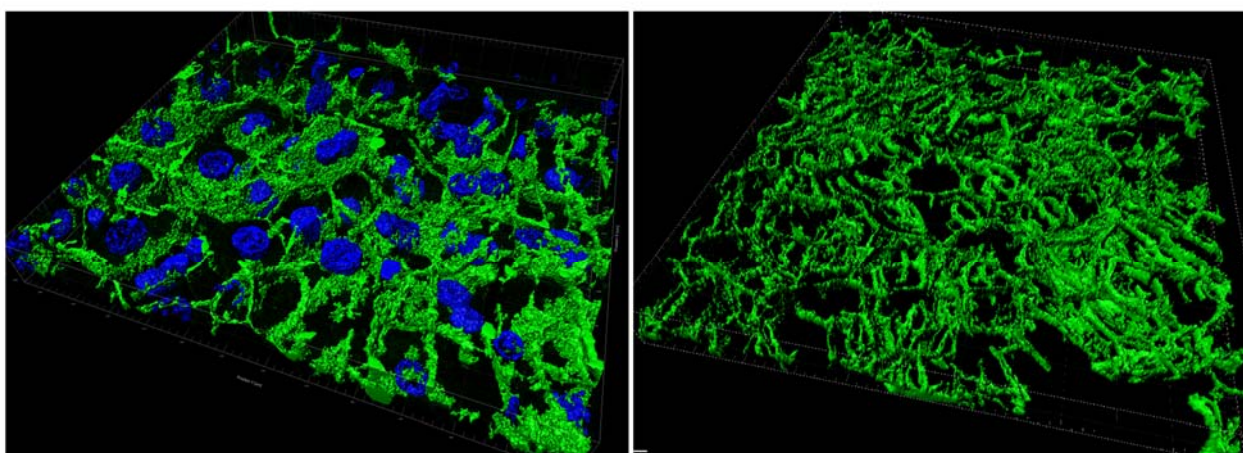

**Figure S2.** 3D volumetric projections showing similar actin distribution of *ex vivo* (left) and *in vivo* (right) samples.

## Lab on a Chip

## ARTICLE

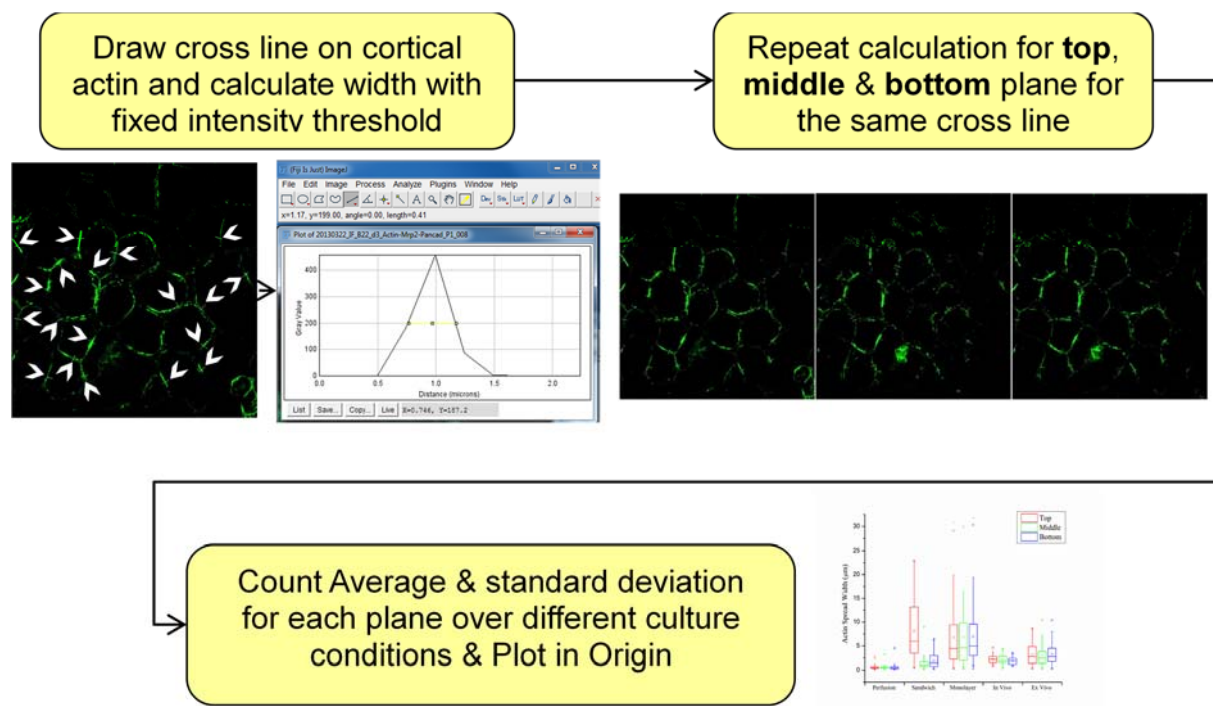

**Figure S3.** Method of quantifying actin fiber spread width in top, middle and bottom planes.

| Gene   | Forward sequence      | Reverse sequence         |
|--------|-----------------------|--------------------------|
| GAPDH  | AGACAGCCGCATCTTCTTGT  | TGATGGCAACAATGTCCACT     |
| Cyp1a2 | CACGGCTTTCTGACAGACCC  | CCAAGCCGAAGAGCATCACC     |
| Cyp2b2 | ACCGGCTACCAACCCTTGAT  | TGTGTGGTACTCCAATAGGGACAA |
| Cyp3a2 | TGGGACCCGCACACATGGACT | TCCGTGATGGCAAACAGAGGCA   |

**Table S1.** Primer sequence in qPCR assay.
